# Supplementary material for: The Effect of Postnatal Steroids on Lung Ultrasound Scores and Extubation Readiness in Very Low Birth Weight infants
Source: Research Square preprint supplement (doi:10.21203/rs.3.rs-5632990/v1), 2024-12-30
Supplement: Supplementary file 1 [file 74521b67db4b567f54f34c7f.docx]

**Table 1. Demographic Characteristics of Very Low Birth Weight (VLBW) Infants**

| **Characteristics** | **(N=45)** |
| --- | --- |
| Gestational Age, weeks, mean (SD) | 27 ± 2 |
| Birth Weight g, mean (SD) | Mean: 859 grams ± 289 |
| Antenatal Steroids N, (%) | None: 5 (11%)  Incomplete (1 dose): 10 (22%)  Complete (≥ 2 doses): 30 (67%) |
| Vaginal/Cesarean Section N (%) | C-section: 35 (78%) |
| Race, N (%)  African American  Hispanic  Caucasian  Other | 35 (78%)  (9%)  4 (9%)  2 (4%) |
| Sex, N (%) | Females: 30 (78%) |
| One-minute APGAR score <7, N (%) | 44 (97%) |
| Five-minute APGAR score <7, N (%) | 28 (67%) |
| Surfactant N, (%)  None  1 dose  2 doses  3 doses | None: 3(7%)  1 Dose: 5 (11%)  2 Doses: 20 (44%)  3 Doses: 17 (38%) |
