# Supplementary material for: The Effect of Postnatal Steroids on Lung Ultrasound Scores and Extubation Readiness in Very Low Birth Weight infants
Source: Research Square preprint supplement (doi:10.21203/rs.3.rs-5632990/v1), 2024-12-30
Supplement: Supplementary file 2 [file db96fad16e13beec8b9b4f53.docx]

**Table 3. Extubations at ≤ 30 vs >30 Post-natal Days in VLBW Infants**

|  | **≤ 30 Days (N=29)** | **>30 Days (N=16)** | **P Value** |
| --- | --- | --- | --- |
| Successful Extubation | 23 (80%) | 9 (57%) | 0.10 |
| Unsuccessful Extubation | 6 (20%) | 7 (43%) |  |
| Gestational Age at Birth | 28 ± 2 | 25 ± 2 | 0.001 |
| Birth Weight | 977 ± 265 | 643 ± 190 | 0.001 |
| Corrected Gestational Age at Extubation | 28 ± 2 | 33 ± 3 | 0.001 |
| Postnatal Day at Extubation | 4 days (2 – 6) | 55 days (45 – 65) | 0.001 |
| Weight at Extubation | 1005 ± 286 | 1456 ± 353 | 0.001 |
