# Supplementary material for: The Effect of Postnatal Steroids on Lung Ultrasound Scores and Extubation Readiness in Very Low Birth Weight infants
Source: Research Square preprint supplement (doi:10.21203/rs.3.rs-5632990/v1), 2024-12-30
Supplement: Supplementary file 3 [file f5e931b312f85ffb38a33692.docx]

**Table 2: Successful vs Unsuccessful Extubation Events in VLBW Infants**

|  | **Successful** | **Unsuccessful** | **P Value** |
| --- | --- | --- | --- |
| Number of Events | 40 (75%) | 13 (25%) |  |
| Gestational Age at Birth (weeks) | 27 ± 2 | 26 ± 1.5 | 0.005 |
| Birth Weight (Grams) | 900 ± 300 | 729 ± 110 | 0.09 |
| Corrected Gestational Age at Extubation (Weeks) | 30 ± 2 | 31 ± 3 | 0.95 |
| ­­­­­­­­­­­­­Weight at Extubation (Grams) | 1198 ± 447 | 1168 ± 328 | 0.88 |
| Antenatal Steroids  Yes  No | 34  12 | 6  1 | 0.86 |
| Mode of Delivery  Vaginal  C-section | 10  30 | 1  12 | 0.18 |
| 1 Min Apg <7 | 38 | 13 | 0.56 |
| 5 Min Apg <7 | 25 | 9 | 0.66 |
|  |  |  |  |
| Surfactant Doses  0  1  2  3 | 3  6  19  12 | 6  7 | 0.26 |
